# Supplementary material for: Genetic associations of persistent opioid use after surgery: a hypothesis-driven analysis of high-value genetic variants in the Michigan Genomics Initiative dataset
Source: Research Square preprint supplement (doi:10.21203/rs.3.rs-3175786/v1), 2023-11-29
Supplement: Supplementary file 1 [file b92b4202212ab18e20327792.xlsx]

## Sheet: Sheet1
PMID	First Author	Publication Year	Journal	Reported Gene	Allele rs#	Study type	Link	Outcome	Sample population	Sample size	No. Cases	No. Controls	Outcome Type	Opioid Type	Opioid Usage	Eligible for Evaluation in MGI
28786760	Albonaim	2017	J Addict Dis	OPRK1	rs6473797	candidate	https://www.tandfonline.com/doi/abs/10.1080/10550887.2017.1361724?journalCode=wjad20	opioid addiction		404	202	202	binary	opioids	opioid use disorder	yes
28786760	Albonaim	2017	J Addict Dis	OPRK1	rs6985606	candidate	https://www.tandfonline.com/doi/abs/10.1080/10550887.2017.1361724?journalCode=wjad20	opioid addiction		404	202	202	binary	opioids	opioid use disorder	yes
28786760	Albonaim	2017	J Addict Dis	OPRK1	rs997917	candidate	https://www.tandfonline.com/doi/abs/10.1080/10550887.2017.1361724?journalCode=wjad20	opioid addiction		404	202	202	binary	opioids	opioid use disorder	yes
24086514	Beer	2013	PloS One	GAL	rs948854	candidate	https://www.ncbi.nlm.nih.gov/pmc/articles/PMC3783401/	opioid addiction	European	284	142	142	binary	heroin/morphine	opioid use disorder	yes
24086514	Beer	2013	PloS One	OPRD1	rs2236861	candidate	https://www.ncbi.nlm.nih.gov/pmc/articles/PMC3783401/	opioid addiction	European	284	142	142	binary	heroin/morphine	opioid use disorder	yes
20032820	Briant	2010	Psychiatr Genet	OPRL1	rs6090041	candidate	https://www.ncbi.nlm.nih.gov/pmc/articles/PMC3832186/	former heroin addiction	European	176	100	76	binary	heroin	opioid use disorder	yes
20032820	Briant	2010	Psychiatr Genet	OPRL1	rs6090043	candidate	https://www.ncbi.nlm.nih.gov/pmc/articles/PMC3832186/	former heroin addiction	European	176	100	76	binary	heroin	opioid use disorder	yes
31250797	Brick	2019	J Stud Alcohol Drugs	LOC101927293	rs1557219	gwas	https://www.ncbi.nlm.nih.gov/pmc/articles/PMC6614928/	heroin dependence	European	4064	2120	1944	binary	heroin	opioid use disorder	yes
31250797	Brick	2019	J Stud Alcohol Drugs	LOC101927293	rs1970606	gwas	https://www.ncbi.nlm.nih.gov/pmc/articles/PMC6614928/	heroin dependence	European	4064	2120	1944	binary	heroin	opioid use disorder	yes
20668445	Bunten	2010	Clin Pharmacol Ther	CYP2B6	rs2279343	candidate	https://ascpt.onlinelibrary.wiley.com/doi/abs/10.1038/clpt.2010.127?casa_token=CCOyO5VGw6IAAAAA%3Ak1I_E6NPNuOY6A5TqcuFPmn4kS-JUiYz72FGHhwOKZ7jsvBgM-w3OO_AjzYWrcpVJv3kzjoN5_hPLQ0	susceptibility to methadone poisoning/higher postmortem methadone concentrations in blood		40			quantitative/ordinal	methadone	drug treatment	no - variant not in MGI
20668445	Bunten	2010	Clin Pharmacol Ther	CYP2B6	rs3745274	candidate	https://ascpt.onlinelibrary.wiley.com/doi/abs/10.1038/clpt.2010.127?casa_token=CCOyO5VGw6IAAAAA%3Ak1I_E6NPNuOY6A5TqcuFPmn4kS-JUiYz72FGHhwOKZ7jsvBgM-w3OO_AjzYWrcpVJv3kzjoN5_hPLQ0	susceptibility to methadone poisoning/higher postmortem methadone concentrations in blood		40			quantitative/ordinal	methadone	drug treatment	yes
25903311	Carlquist	2015	Mol Diagn Ther	CYP2C19	rs4244285	candidate	https://link.springer.com/article/10.1007/s40291-015-0137-4	Total plasma EDDP, (S)-EDDP, and (R)-EDDP concentrations	Trans-ancestry	25			quantitative/ordinal	methadone	drug treatment	yes
16109452	Cheng	2005	Brain Res Mol Brain Res	BDNF	rs6265	candidate	https://www.sciencedirect.com/science/article/pii/S0169328X05003098?via%3Dihub	heroin dependence	Han Chinese	322	200	122	binary	heroin	opioid use disorder	yes
29478698	Cheng	2018	Biol Psychiatry	RGMA	rs12442183	gwas	https://www.ncbi.nlm.nih.gov/pmc/articles/PMC6041180/	opioid dependence	European	1388			quantitative/ordinal	opioids	opioid use disorder	no - pval > 1.5E-8
29478698	Cheng	2018	Biol Psychiatry	RGMA	rs12442183	gwas; meta-analysis	https://www.ncbi.nlm.nih.gov/pmc/articles/PMC6041180/	opioid dependence	European	3058			quantitative/ordinal	opioids	opioid use disorder	yes
26810133	Chidambaran	2017	Pharmacogenomics J	ABCC3	rs4148412	candidate	https://www.ncbi.nlm.nih.gov/pmc/articles/PMC4959996/	morphine-induced prolonged respiratory depression	African American; European	316			quantitative/ordinal	morphine	clinical pain research	yes
26810133	Chidambaran	2017	Pharmacogenomics J	ABCC3	rs739923	candidate	https://www.ncbi.nlm.nih.gov/pmc/articles/PMC4959996/	morphine-induced prolonged respiratory depression	African American; European	316			quantitative/ordinal	morphine	clinical pain research	yes
20218801	Chien	2010	World J Biol Psychiatry	DRD4	exon 3 VNTR polymorphism	candidate	https://pubmed.ncbi.nlm.nih.gov/20218801/	heroin dependence	Han Chinese	1074	894	180	binary	heroin	opioid use disorder	no - not a SNP
22443215	Clarke	2012	Genes Brain Behav	PDYN	rs1022563	candidate	https://onlinelibrary.wiley.com/doi/epdf/10.1111/j.1601-183X.2012.00785.x	opioid addiction	European	1696	1040	656	binary	heroin	opioid use disorder	yes
22443215	Clarke	2012	Genes Brain Behav	PDYN	rs1022563	candidate	https://onlinelibrary.wiley.com/doi/epdf/10.1111/j.1601-183X.2012.00785.x	opioid addiction	European females	678	355	323	binary	heroin	opioid use disorder	yes
22443215	Clarke	2012	Genes Brain Behav	PDYN	rs199779	candidate	https://onlinelibrary.wiley.com/doi/epdf/10.1111/j.1601-183X.2012.00785.x	opioid addiction	European females	678	355	323	binary	heroin	opioid use disorder	yes
22443215	Clarke	2012	Genes Brain Behav	PDYN	rs910080	candidate	https://onlinelibrary.wiley.com/doi/epdf/10.1111/j.1601-183X.2012.00785.x	opioid addiction	European females	678	355	323	binary	heroin	opioid use disorder	yes
	Coenen	2022			rs549224715	gwas	https://assets.researchsquare.com/files/rs-1874694/v1/de44d554-b1d8-46cf-8b9f-46287782c62b.pdf?c=1661277087	opioid use for musculoskeletal pain	NA	23815	11089	12726	binary	opioids	pharmacological research	no - pval > 1.5E-8
10321497	Comings	1999	Neuroreport	PENK	(CA)n repeat	candidate	https://pubmed.ncbi.nlm.nih.gov/10321497/	heroin dependence	European	163	31	132	binary	heroin	opioid use disorder	no - not a SNP
30368523	Crist	2019	Pharmacogenomics J	OPRD1	rs678849	candidate	https://www.ncbi.nlm.nih.gov/pmc/articles/PMC6486881/	opioid-positive drug screens	African American	55			quantitative/ordinal	buprenorphine	drug treatment	yes
35879402	Deak	2022	Molecular Psychiatry	BARHL2	rs2166171	gwas; multi-trait analysis of meta-analysis GWAS summary statistics	https://www.nature.com/articles/s41380-022-01709-10	opioid use disorder (MTAG)	European	554186	15251	538935	binary	opioids	opioid use disorder	yes
35879402	Deak	2022	Molecular Psychiatry	CTB-129P6.11	rs10422888	gwas; multi-trait analysis of meta-analysis GWAS summary statistics	https://www.nature.com/articles/s41380-022-01709-15	opioid use disorder (MTAG)	European	554186	15251	538935	binary	opioids	opioid use disorder	no - pval > 1.5E-8
35879402	Deak	2022	Molecular Psychiatry	FOXP2	rs1989903	gwas; multi-trait analysis of meta-analysis GWAS summary statistics	https://www.nature.com/articles/s41380-022-01709-4	opioid use disorder (MTAG)	European	554186	15251	538935	binary	opioids	opioid use disorder	yes
35879402	Deak	2022	Molecular Psychiatry	FTO	rs7188250	gwas; multi-trait analysis of meta-analysis GWAS summary statistics	https://www.nature.com/articles/s41380-022-01709-19	opioid use disorder (MTAG)	European	554186	15251	538935	binary	opioids	opioid use disorder	no - pval > 1.5E-8
35879402	Deak	2022	Molecular Psychiatry	FURIN	rs11372849	gwas; meta-analysis	https://www.nature.com/articles/s41380-022-01709-1	opioid use disorder	European	554186	15251	538935	binary	opioids	opioid use disorder	no - variant not in MGI
35879402	Deak	2022	Molecular Psychiatry	FURIN	rs17514846	gwas; multi-trait analysis of meta-analysis GWAS summary statistics	https://www.nature.com/articles/s41380-022-01709-16	opioid use disorder (MTAG)	European	554186	15251	538935	binary	opioids	opioid use disorder	no - pval > 1.5E-8
35879402	Deak	2022	Molecular Psychiatry	GMEB1	rs6667501	gwas; multi-trait analysis of meta-analysis GWAS summary statistics	https://www.nature.com/articles/s41380-022-01709-14	opioid use disorder (MTAG)	European	554186	15251	538935	binary	opioids	opioid use disorder	no - pval > 1.5E-8
35879402	Deak	2022	Molecular Psychiatry	HS6ST3	rs2389631	gwas; multi-trait analysis of meta-analysis GWAS summary statistics	https://www.nature.com/articles/s41380-022-01709-18	opioid use disorder (MTAG)	European	554186	15251	538935	binary	opioids	opioid use disorder	no - pval > 1.5E-8
35879402	Deak	2022	Molecular Psychiatry	NCAM1	rs1940701	gwas; multi-trait analysis of meta-analysis GWAS summary statistics	https://www.nature.com/articles/s41380-022-01709-7	opioid use disorder (MTAG)	European	554186	15251	538935	binary	opioids	opioid use disorder	yes
35879402	Deak	2022	Molecular Psychiatry	NICN1	rs77648866	gwas; multi-trait analysis of meta-analysis GWAS summary statistics	https://www.nature.com/articles/s41380-022-01709-3	opioid use disorder (MTAG)	European	554186	15251	538935	binary	opioids	opioid use disorder	yes
35879402	Deak	2022	Molecular Psychiatry	OPRM1	rs1799971	gwas; meta-analysis	https://www.nature.com/articles/s41380-022-01709-1	opioid use disorder	African; European	639063	20686	618377	binary	opioids	opioid use disorder	no - pval > 1.5E-8
35879402	Deak	2022	Molecular Psychiatry	OPRM1	rs1799971	gwas; meta-analysis	https://www.nature.com/articles/s41380-022-01709-1	opioid use disorder	European	554186	15251	538935	binary	opioids	opioid use disorder	yes
35879402	Deak	2022	Molecular Psychiatry	OPRM1	rs79704991	gwas; meta-analysis	https://www.nature.com/articles/s41380-022-01709-1	opioid use disorder	European	554186	15251	538935	binary	opioids	opioid use disorder	yes
35879402	Deak	2022	Molecular Psychiatry	OPRM1	rs9478500	gwas; meta-analysis	https://www.nature.com/articles/s41380-022-01709-1	opioid use disorder	African; European	639063	20686	618377	binary	opioids	opioid use disorder	no - pval > 1.5E-8
35879402	Deak	2022	Molecular Psychiatry	PDE4B	rs7519259	gwas; multi-trait analysis of meta-analysis GWAS summary statistics	https://www.nature.com/articles/s41380-022-01709-5	opioid use disorder (MTAG)	European	554186	15251	538935	binary	opioids	opioid use disorder	yes
35879402	Deak	2022	Molecular Psychiatry	PLCL2	rs55855024	gwas; multi-trait analysis of meta-analysis GWAS summary statistics	https://www.nature.com/articles/s41380-022-01709-11	opioid use disorder (MTAG)	European	554186	15251	538935	binary	opioids	opioid use disorder	yes
35879402	Deak	2022	Molecular Psychiatry	RABEPK	rs864882	gwas; multi-trait analysis of meta-analysis GWAS summary statistics	https://www.nature.com/articles/s41380-022-01709-8	opioid use disorder (MTAG)	European	554186	15251	538935	binary	opioids	opioid use disorder	yes
35879402	Deak	2022	Molecular Psychiatry	RP11-254A17.1	rs9350100	gwas; multi-trait analysis of meta-analysis GWAS summary statistics	https://www.nature.com/articles/s41380-022-01709-9	opioid use disorder (MTAG)	European	554186	15251	538935	binary	opioids	opioid use disorder	yes
35879402	Deak	2022	Molecular Psychiatry	SEMA6D	rs73403005	gwas; multi-trait analysis of meta-analysis GWAS summary statistics	https://www.nature.com/articles/s41380-022-01709-17	opioid use disorder (MTAG)	European	554186	15251	538935	binary	opioids	opioid use disorder	no - pval > 1.5E-8
35879402	Deak	2022	Molecular Psychiatry	SLC39A8	rs13135092	gwas; multi-trait analysis of meta-analysis GWAS summary statistics	https://www.nature.com/articles/s41380-022-01709-6	opioid use disorder (MTAG)	European	554186	15251	538935	binary	opioids	opioid use disorder	yes
35879402	Deak	2022	Molecular Psychiatry	TMEM120A	rs6467958	gwas; multi-trait analysis of meta-analysis GWAS summary statistics	https://www.nature.com/articles/s41380-022-01709-12	opioid use disorder (MTAG)	European	554186	15251	538935	binary	opioids	opioid use disorder	no - variant not in MGI
35879402	Deak	2022	Molecular Psychiatry	TMPRSS5	rs11214677	gwas; multi-trait analysis of meta-analysis GWAS summary statistics	https://www.nature.com/articles/s41380-022-01709-13	opioid use disorder (MTAG)	European	554186	15251	538935	binary	opioids	opioid use disorder	yes
35879402	Deak	2022	Molecular Psychiatry	TMX2/CTNND1	rs11229119	gwas; multi-trait analysis of meta-analysis GWAS summary statistics	https://www.nature.com/articles/s41380-022-01709-2	opioid use disorder (MTAG)	European	554186	15251	538935	binary	opioids	opioid use disorder	yes
25500252	Deng	2015	Hum Immunol	DRD2/ANKK1	rs1800497	candidate; meta-analysis	https://www.sciencedirect.com/science/article/pii/S0198885914005059?via%3Dihub	opioid dependence	Asian	3284	1749	1535	binary	opioids	opioid use disorder	yes
25500252	Deng	2015	Hum Immunol	DRD2/ANKK1	rs1800497	candidate; meta-analysis	https://www.sciencedirect.com/science/article/pii/S0198885914005059?via%3Dihub	opioid dependence	European	3069	1603	1466	binary	opioids	opioid use disorder	yes
25500252	Deng	2015	Hum Immunol	DRD2/ANKK1	rs1800497	candidate; meta-analysis	https://www.sciencedirect.com/science/article/pii/S0198885914005059?via%3Dihub	opioid dependence	Trans-ancestry	6519	3423	3096	binary	opioids	opioid use disorder	yes
31907389	Fang	2020	J Hum Genet	OPRD1	rs204047	candidate	https://www.nature.com/articles/s10038-019-0718-x	methadon dosage	Taiwanese	344			quantitative/ordinal	methadone	drug treatment	yes
31907389	Fang	2020	J Hum Genet	OPRD1	rs204047	candidate	https://www.nature.com/articles/s10038-019-0718-x	plasma R, S-methadone concentrations	Taiwanese	344			quantitative/ordinal	methadone	drug treatment	yes
31907389	Fang	2020	J Hum Genet	OPRD1	rs797397	candidate	https://www.nature.com/articles/s10038-019-0718-x	plasma R, S-methadone concentrations/better response to methadone drug treatment	Taiwanese	344			quantitative/ordinal	methadone	drug treatment	yes
36207451	Gaddis	2022	Scientific Reports	FURIN	rs11372849	candidate; meta-analysis	https://www.ncbi.nlm.nih.gov/pmc/articles/PMC9546890/	opioid addiction	European	304831	7281	297550	binary	opioids	opioid use disorder	no - variant not in MGI
36207451	Gaddis	2022	Scientific Reports	FURIN	rs17514846	gene-based; meta-analysis	https://www.ncbi.nlm.nih.gov/pmc/articles/PMC9546890/	opioid addiction	European	304831	7281	297550	binary	opioids	opioid use disorder	yes
36207451	Gaddis	2022	Scientific Reports	OPRM1	OPRM1	gene-based; meta-analysis	https://www.ncbi.nlm.nih.gov/pmc/articles/PMC9546890/	opioid addiction	European	304831	7281	297550	binary	opioids	opioid use disorder	no - not a SNP
36207451	Gaddis	2022	Scientific Reports	OPRM1	rs9478500	gwas; meta-analysis	https://www.ncbi.nlm.nih.gov/pmc/articles/PMC9546890/	opioid addiction	European	304831	7281	297550	binary	opioids	opioid use disorder	yes
36207451	Gaddis	2022	Scientific Reports	PPP6C	PPP6C	gene-based; meta-analysis	https://www.ncbi.nlm.nih.gov/pmc/articles/PMC9546890/	opioid addiction	European	304831	7281	297550	binary	opioids	opioid use disorder	yes
36207451	Gaddis	2022	Scientific Reports	RIPOR1	rs13333582	gwas; meta-analysis	https://www.ncbi.nlm.nih.gov/pmc/articles/PMC9546890/	opioid addiction	European	304831	7281	297550	binary	opioids	opioid use disorder	no - pval > 1.5E-8
36207451	Gaddis	2022	Scientific Reports		rs28386916	gwas; meta-analysis	https://www.ncbi.nlm.nih.gov/pmc/articles/PMC9546890/	opioid addiction	European	304831	7281	297550	binary	opioids	opioid use disorder	no - variant not in MGI
28692418	Gao	2017	OMICS	DRD2	rs1076560	candidate	https://www.liebertpub.com/doi/10.1089/omi.2017.0057?url_ver=Z39.88-2003&rfr_id=ori:rid:crossref.org&rfr_dat=cr_pub%20%200pubmed	heroin dependence	Han Chinese	774	546	228	binary	heroin	opioid use disorder	yes
28692418	Gao	2017	OMICS	DRD2	rs1079596	candidate	https://www.liebertpub.com/doi/10.1089/omi.2017.0057?url_ver=Z39.88-2003&rfr_id=ori:rid:crossref.org&rfr_dat=cr_pub%20%200pubmed	heroin dependence	Han Chinese	774	546	228	binary	heroin	opioid use disorder	yes
28692418	Gao	2017	OMICS	DRD2	rs11214607	candidate	https://www.liebertpub.com/doi/10.1089/omi.2017.0057?url_ver=Z39.88-2003&rfr_id=ori:rid:crossref.org&rfr_dat=cr_pub%20%200pubmed	heroin dependence	Han Chinese	774	546	228	binary	heroin	opioid use disorder	yes
28692418	Gao	2017	OMICS	DRD2	rs2075652	candidate	https://www.liebertpub.com/doi/10.1089/omi.2017.0057?url_ver=Z39.88-2003&rfr_id=ori:rid:crossref.org&rfr_dat=cr_pub%20%200pubmed	heroin dependence	Han Chinese	774	546	228	binary	heroin	opioid use disorder	yes
28692418	Gao	2017	OMICS	DRD2	rs2283265	candidate	https://www.liebertpub.com/doi/10.1089/omi.2017.0057?url_ver=Z39.88-2003&rfr_id=ori:rid:crossref.org&rfr_dat=cr_pub%20%200pubmed	heroin dependence	Han Chinese	774	546	228	binary	heroin	opioid use disorder	yes
28692418	Gao	2017	OMICS	DRD2	rs2734833	candidate	https://www.liebertpub.com/doi/10.1089/omi.2017.0057?url_ver=Z39.88-2003&rfr_id=ori:rid:crossref.org&rfr_dat=cr_pub%20%200pubmed	heroin dependence	Han Chinese	774	546	228	binary	heroin	opioid use disorder	yes
28692418	Gao	2017	OMICS	DRD2	rs4436578	candidate	https://www.liebertpub.com/doi/10.1089/omi.2017.0057?url_ver=Z39.88-2003&rfr_id=ori:rid:crossref.org&rfr_dat=cr_pub%20%200pubmed	heroin dependence	Han Chinese	774	546	228	binary	heroin	opioid use disorder	yes
28692418	Gao	2017	OMICS	DRD2	rs6277	candidate	https://www.liebertpub.com/doi/10.1089/omi.2017.0057?url_ver=Z39.88-2003&rfr_id=ori:rid:crossref.org&rfr_dat=cr_pub%20%200pubmed	heroin dependence	Han Chinese	774	546	228	binary	heroin	opioid use disorder	yes
28692418	Gao	2017	OMICS	OPRD1	rs2236857	candidate	https://www.liebertpub.com/doi/10.1089/omi.2017.0057?url_ver=Z39.88-2003&rfr_id=ori:rid:crossref.org&rfr_dat=cr_pub%20%200pubmed	heroin dependence	Han Chinese	774	546	228	binary	heroin	opioid use disorder	yes
28692418	Gao	2017	OMICS	OPRD1	rs4654327	candidate	https://www.liebertpub.com/doi/10.1089/omi.2017.0057?url_ver=Z39.88-2003&rfr_id=ori:rid:crossref.org&rfr_dat=cr_pub%20%200pubmed	heroin dependence	Han Chinese	774	546	228	binary	heroin	opioid use disorder	yes
28692418	Gao	2017	OMICS	OPRD1	rs508448	candidate	https://www.liebertpub.com/doi/10.1089/omi.2017.0057?url_ver=Z39.88-2003&rfr_id=ori:rid:crossref.org&rfr_dat=cr_pub%20%200pubmed	heroin dependence	Han Chinese	774	546	228	binary	heroin	opioid use disorder	yes
28692418	Gao	2017	OMICS	OPRD1	rs6669447	candidate	https://www.liebertpub.com/doi/10.1089/omi.2017.0057?url_ver=Z39.88-2003&rfr_id=ori:rid:crossref.org&rfr_dat=cr_pub%20%200pubmed	heroin dependence	Han Chinese	774	546	228	binary	heroin	opioid use disorder	yes
24143882	Gelernter	2014	Biol Psychiatry	APBB2	rs115368721	candidate; meta-analysis	https://www.ncbi.nlm.nih.gov/pmc/articles/PMC3992201/	opioid dependence (sympcount_adj)	African American	4593	839	3754	binary	opioids	opioid use disorder	yes
24143882	Gelernter	2014	Biol Psychiatry	HHLA2	rs73204138	gwas	https://www.ncbi.nlm.nih.gov/pmc/articles/PMC3992201/	opioid dependence (sympcount_adj)	African American	3282	732	2550	binary	opioids	opioid use disorder	no - pval > 1.5E-8
24143882	Gelernter	2014	Biol Psychiatry	KCNC1	rs60349741	gwas	https://www.ncbi.nlm.nih.gov/pmc/articles/PMC3992201/	opioid dependence (sympcount_adj)	African American	3282	732	2550	binary	opioids	opioid use disorder	yes
24143882	Gelernter	2014	Biol Psychiatry	KCNC1	rs60349741	candidate; meta-analysis	https://www.ncbi.nlm.nih.gov/pmc/articles/PMC3992201/	opioid dependence (sympcount_adj)	African American	4593	839	3754	binary	opioids	opioid use disorder	yes
24143882	Gelernter	2014	Biol Psychiatry	KCNG2	rs62103177	candidate; meta-analysis	https://www.ncbi.nlm.nih.gov/pmc/articles/PMC3992201/	opioid dependence (sympcount_adj)	African American	4593	839	3754	binary	opioids	opioid use disorder	yes
24143882	Gelernter	2014	Biol Psychiatry	KCNG2	rs62103177	candidate; meta-analysis	https://www.ncbi.nlm.nih.gov/pmc/articles/PMC3992201/	opioid dependence (sympcount_adj)	African American	5346	991	4355	binary	opioids	opioid use disorder	yes
24143882	Gelernter	2014	Biol Psychiatry	PARVA	rs73411566	candidate; meta-analysis	https://www.ncbi.nlm.nih.gov/pmc/articles/PMC3992201/	opioid dependence (sympcount_adj)	African American	4593	839	3754	binary	opioids	opioid use disorder	yes
24143882	Gelernter	2014	Biol Psychiatry	PITPNM3	rs9913974	gwas	https://www.ncbi.nlm.nih.gov/pmc/articles/PMC3992201/	opioid dependence	African American	1277	638	639	binary	opioids	opioid use disorder	yes
15048645	Gerra	2004	Am J Med Genet B Neuropsychiatr Genet	HTR1B	5-HTTLPR	candidate	https://pubmed.ncbi.nlm.nih.gov/15048645/	heroin dependence	European	202	101	101	binary	heroin	opioid use disorder	no - not a SNP
17373729	Gerra	2007	Am J Med Genet B Neuropsychiatr Genet	OPRK1	rs1051660	candidate	https://onlinelibrary.wiley.com/doi/10.1002/ajmg.b.30510	heroin dependence	European	176	106	70	binary	heroin	opioid use disorder	yes
30031856	Gutteridge	2018	J Pain Symptom Manage	TAOK3	rs1277441	candidate	https://www.sciencedirect.com/science/article/pii/S0885392418303646	morphine equivalent daily dose	Canadian, predominantly Caucasian	110			quantitative/ordinal	codeine/morphine/hydromorphone/oxycodone/fentanyl/methadone	clinical pain research	yes
30031856	Gutteridge	2018	J Pain Symptom Manage	TAOK3	rs795484	candidate	https://www.sciencedirect.com/science/article/pii/S0885392418303646	morphine equivalent daily dose	Canadian, predominantly Caucasian	110			quantitative/ordinal	codeine/morphine/hydromorphone/oxycodone/fentanyl/methadone	clinical pain research	yes
25744370	Hancock	2015	Biol Psychiatry.	OPRM1	rs3778150	candidate; meta-analysis	https://www.ncbi.nlm.nih.gov/pmc/articles/PMC4519434/	heroin addiction	African American; European	10703	1950	8753	binary	heroin	opioid use disorder	yes
25744370	Hancock	2015	Biol Psychiatry.	OPRM1	rs3778150	candidate; meta-analysis	https://www.ncbi.nlm.nih.gov/pmc/articles/PMC4519434/	heroin addiction	African American; European	16729	4287	12442	binary	heroin	opioid use disorder	yes
25744370	Hancock	2015	Biol Psychiatry.	OPRM1	rs3778151	candidate; replication; meta-analysis	https://www.ncbi.nlm.nih.gov/pmc/articles/PMC4519434/	heroin addiction	African American; European	16729	4287	12442	binary	heroin	opioid use disorder	yes
25744370	Hancock	2015	Biol Psychiatry.	OPRM1	rs3823010	candidate; replication; meta-analysis	https://www.ncbi.nlm.nih.gov/pmc/articles/PMC4519434/	heroin addiction	African American; European	16729	4287	12442	binary	heroin	opioid use disorder	no - variant not in MGI
25744370	Hancock	2015	Biol Psychiatry.	OPRM1	rs495491	candidate; replication; meta-analysis	https://www.ncbi.nlm.nih.gov/pmc/articles/PMC4519434/	heroin addiction	African American; European	16729	4287	12442	binary	heroin	opioid use disorder	no - variant not in MGI
25744370	Hancock	2015	Biol Psychiatry.	OPRM1	rs510769	candidate; replication; meta-analysis	https://www.ncbi.nlm.nih.gov/pmc/articles/PMC4519434/	heroin addiction	African American; European	16729	4287	12442	binary	heroin	opioid use disorder	no - variant not in MGI
25744370	Hancock	2015	Biol Psychiatry.	OPRM1	rs511435	candidate; replication; meta-analysis	https://www.ncbi.nlm.nih.gov/pmc/articles/PMC4519434/	heroin addiction	African American; European	16729	4287	12442	binary	heroin	opioid use disorder	no - variant not in MGI
25744370	Hancock	2015	Biol Psychiatry.	OPRM1	rs524731	candidate; replication; meta-analysis	https://www.ncbi.nlm.nih.gov/pmc/articles/PMC4519434/	heroin addiction	African American; European	16729	4287	12442	binary	heroin	opioid use disorder	no - variant not in MGI
25744370	Hancock	2015	Biol Psychiatry.	OPRM1	rs562859	candidate; meta-analysis	https://www.ncbi.nlm.nih.gov/pmc/articles/PMC4519434/	heroin addiction	African American; European	10703	1950	8753	binary	heroin	opioid use disorder	no - variant not in MGI
25744370	Hancock	2015	Biol Psychiatry.		rs9384169	candidate; meta-analysis	https://www.ncbi.nlm.nih.gov/pmc/articles/PMC4519434/	heroin addiction	African American; European	10703	1950	8753	binary	heroin	opioid use disorder	no - variant not in MGI
25744370	Hancock	2015	Biol Psychiatry.		rs9478495	candidate; meta-analysis	https://www.ncbi.nlm.nih.gov/pmc/articles/PMC4519434/	heroin addiction	African American; European	10703	1950	8753	binary	heroin	opioid use disorder	yes
26382569	Hancock	2015	Genes Brain Behav	ZNF804A	rs1344706	candidate; meta-analysis; replication	https://www.ncbi.nlm.nih.gov/pmc/articles/PMC4715582/	heroin dependence	African American; European	10757	2004	8753	binary	heroin	opioid use disorder	yes
26382569	Hancock	2015	Genes Brain Behav	ZNF804A	rs1344706	candidate; replication	https://www.ncbi.nlm.nih.gov/pmc/articles/PMC4715582/	heroin dependence	European	7095	711	6384	binary	heroin	opioid use disorder	yes
26382569	Hancock	2015	Genes Brain Behav	ZNF804A	rs7597593	candidate; replication	https://www.ncbi.nlm.nih.gov/pmc/articles/PMC4715582/	heroin dependence	European	7095	711	6384	binary	heroin	opioid use disorder	yes
31806881	Ho	2019	Pharmacogenomics J	COMT	rs4633	candidate	https://www.nature.com/articles/s41397-019-0131-z	pharmacodynamic effects of mophine on ischemic pain	African American; White	108			quantitative/ordinal	morphine/butorphanol	laboratory test	yes
31806881	Ho	2019	Pharmacogenomics J	COMT	rs4680	candidate	https://www.nature.com/articles/s41397-019-0131-z	pharmacodynamic effects of mophine on ischemic pain	African American; White	108			quantitative/ordinal	morphine/butorphanol	laboratory test	yes
31806881	Ho	2019	Pharmacogenomics J	COMT	rs4818	candidate	https://www.nature.com/articles/s41397-019-0131-z	pharmacodynamic effects of butorphanol on PPT	African American; White	108			quantitative/ordinal	morphine/butorphanol	laboratory test	yes
31806881	Ho	2019	Pharmacogenomics J	COMT	rs6269	candidate	https://www.nature.com/articles/s41397-019-0131-z	pharmacodynamic effects of butorphanol on PPT	African American; White	108			quantitative/ordinal	morphine/butorphanol	laboratory test	no - variant not in MGI
31806881	Ho	2019	Pharmacogenomics J	COMT	rs6269	candidate	https://www.nature.com/articles/s41397-019-0131-z	pharmacodynamic effects of mophine on ischemic pain	African American; White	108			quantitative/ordinal	morphine/butorphanol	laboratory test	no - variant not in MGI
31806881	Ho	2019	Pharmacogenomics J	OPRM1	rs1799971	candidate	https://www.nature.com/articles/s41397-019-0131-z	pharmacodynamic effects of mophine on PPT	African American; White	108			quantitative/ordinal	morphine/butorphanol	laboratory test	yes
30171993	Huang	2019	Prog Neuropsychopharmacol Biol Psychiatry	OPRD1	rs2234918	candidate	https://www.sciencedirect.com/science/article/pii/S0278584618304184?via%3Dihub	heroin dependence	Han Chinese	1331	801	530	binary	heroin	opioid use disorder	yes
30171993	Huang	2019	Prog Neuropsychopharmacol Biol Psychiatry	OPRD1	rs2236857	candidate	https://www.sciencedirect.com/science/article/pii/S0278584618304184?via%3Dihub	heroin dependence	Han Chinese	1331	801	530	binary	heroin	opioid use disorder	yes
21458533	Jia	2011	Neurosci Lett	BDNF	rs13306221	candidate	https://www.sciencedirect.com/science/article/pii/S0304394011003867?via%3Dihub	heroin dependence	Han Chinese	979	487	492	binary	heroin	opioid use disorder	yes
21458533	Jia	2011	Neurosci Lett	BDNF	rs6265	candidate	https://www.sciencedirect.com/science/article/pii/S0304394011003867?via%3Dihub	heroin dependence	Han Chinese	979	487	492	binary	heroin	opioid use disorder	yes
26692286	Jones	2016	Am J Addict	OPRD1	rs10753331	candidate	https://www.ncbi.nlm.nih.gov/pmc/articles/PMC5444323/	abstinence-induced withdrawal severity score	Trans-ancestry	48			quantitative/ordinal	heroin	opioid use disorder	no - variant not in MGI
26692286	Jones	2016	Am J Addict	OPRD1	rs678849	candidate	https://www.ncbi.nlm.nih.gov/pmc/articles/PMC5444323/	abstinence-induced withdrawal severity score	Trans-ancestry	48			quantitative/ordinal	heroin	opioid use disorder	yes
26692286	Jones	2016	Am J Addict	OPRK1	rs6473797	candidate	https://www.ncbi.nlm.nih.gov/pmc/articles/PMC5444323/	naloxone-precipitated withdrawal severity score	Trans-ancestry	48			quantitative/ordinal	heroin	opioid use disorder	yes
26692286	Jones	2016	Am J Addict	OPRM1	rs6848893	candidate	https://www.ncbi.nlm.nih.gov/pmc/articles/PMC5444323/	abstinence-induced withdrawal severity score	Trans-ancestry	48			quantitative/ordinal	heroin	opioid use disorder	yes
31493434	Jones	2019	Pharmacol Biochem Behav.	COMT	rs4680	candidate	https://www.ncbi.nlm.nih.gov/pmc/articles/PMC6801039/	pharmacodynamic effects of oral oxycodone on CPT: stimulated	Trans-ancestry	36			quantitative/ordinal	oxycodone	pharmacogenetic research	yes
31493434	Jones	2019	Pharmacol Biochem Behav.	OPRD1	rs581111	candidate	https://www.ncbi.nlm.nih.gov/pmc/articles/PMC6801039/	pharmacodynamic effects of oral oxycodone on CPT: high quality	Trans-ancestry	36			quantitative/ordinal	oxycodone	pharmacogenetic research	yes
31493434	Jones	2019	Pharmacol Biochem Behav.	OPRM1	rs6848893	candidate	https://www.ncbi.nlm.nih.gov/pmc/articles/PMC6801039/	pharmacodynamic effects of oral oxycodone on CPT: high quality	Trans-ancestry	36			quantitative/ordinal	oxycodone	pharmacogenetic research	yes
27936112	Kalsi	2016	PLoS One	CCDC42	CCDC42	gene-based	https://www.ncbi.nlm.nih.gov/pmc/articles/PMC5147879/	heroin dependence	Han Chinese	504	370	134	binary	heroin	opioid use disorder	no - not a SNP
36171425	Kember	2022	Nature Neuroscience	CDH8	rs9635513	gwas	https://www.nature.com/articles/s41593-022-01160-z#citeas	stringent opioid use disorder	European American	297647	15040	282607	binary	opioids	opioid use disorder	no - pval > 1.5E-8
36171425	Kember	2022	Nature Neuroscience	CDH8	rs9635513	gwas	https://www.nature.com/articles/s41593-022-01160-z#citeas	lenient opioid use disorder	European American	302585	19978	282607	binary	opioids	opioid use disorder	no - pval > 1.5E-8
36171425	Kember	2022	Nature Neuroscience	CDKAL1	rs540090452	gwas; internal meta-analysis	https://www.nature.com/articles/s41593-022-01160-z#citeas	lenient opioid use disorder	African American; European American; Hispanic American	425944	31473	394471	binary	opioids	opioid use disorder	no - variant not in MGI, pval > 5E-8
36171425	Kember	2022	Nature Neuroscience	CDKAL1	rs540090452	gwas; meta-analysis	https://www.nature.com/articles/s41593-022-01160-z#citeas	opioid use disorder	African American; European American; Hispanic American	447580	37826	409754	binary	opioids	opioid use disorder	no - variant not in MGI, pval > 5E-8
36171425	Kember	2022	Nature Neuroscience	CDKAL1	rs540090452	gwas	https://www.nature.com/articles/s41593-022-01160-z#citeas	lenient opioid use disorder	Hispanic American	34861	2527	32334	binary	opioids	opioid use disorder	no - variant not in MGI, pval > 5E-8
36171425	Kember	2022	Nature Neuroscience	FBXW4	rs4919566	gwas; internal meta-analysis	https://www.nature.com/articles/s41593-022-01160-z#citeas	lenient opioid use disorder	African American; European American; Hispanic American	425944	31473	394471	binary	opioids	opioid use disorder	no - pval > 1.5E-8
36171425	Kember	2022	Nature Neuroscience	FBXW4	rs4919566	gwas	https://www.nature.com/articles/s41593-022-01160-z#citeas	lenient opioid use disorder	European American	302585	19978	282607	binary	opioids	opioid use disorder	no - pval > 1.5E-8
36171425	Kember	2022	Nature Neuroscience	FBXW4	rs4919566	gwas; meta-analysis	https://www.nature.com/articles/s41593-022-01160-z#citeas	opioid use disorder	European American	321312	24866	296446	binary	opioids	opioid use disorder	no - pval > 1.5E-8
36171425	Kember	2022	Nature Neuroscience	FURIN	rs3759929	gwas; internal meta-analysis	https://www.nature.com/articles/s41593-022-01160-z#citeas	stringent opioid use disorder	African American; European American; Hispanic American	417930	23459	394471	binary	opioids	opioid use disorder	no - pval > 1.5E-8
36171425	Kember	2022	Nature Neuroscience	FURIN	rs4702	gwas; internal meta-analysis	https://www.nature.com/articles/s41593-022-01160-z#citeas	lenient opioid use disorder	African American; European American; Hispanic American	425944	31473	394471	binary	opioids	opioid use disorder	yes
36171425	Kember	2022	Nature Neuroscience	FURIN	rs4702	gwas	https://www.nature.com/articles/s41593-022-01160-z#citeas	stringent opioid use disorder	European American	297647	15040	282607	binary	opioids	opioid use disorder	yes
36171425	Kember	2022	Nature Neuroscience	FURIN	rs4702	gwas	https://www.nature.com/articles/s41593-022-01160-z#citeas	lenient opioid use disorder	European American	302585	19978	282607	binary	opioids	opioid use disorder	yes
36171425	Kember	2022	Nature Neuroscience	FURIN	rs4702	gwas; meta-analysis	https://www.nature.com/articles/s41593-022-01160-z#citeas	opioid use disorder	European American	321312	24866	296446	binary	opioids	opioid use disorder	yes
36171425	Kember	2022	Nature Neuroscience	FURIN	rs7168951	gwas; meta-analysis	https://www.nature.com/articles/s41593-022-01160-z#citeas	opioid use disorder	African American; European American; Hispanic American	447580	37826	409754	binary	opioids	opioid use disorder	yes
36171425	Kember	2022	Nature Neuroscience	KCNN1	rs112068658	gwas	https://www.nature.com/articles/s41593-022-01160-z#citeas	lenient opioid use disorder	African American	88498	8968	79530	binary	opioids	opioid use disorder	no - pval > 1.5E-8
36171425	Kember	2022	Nature Neuroscience	KCNN1	rs112068658	gwas; meta-analysis	https://www.nature.com/articles/s41593-022-01160-z#citeas	opioid use disorder	African American	91407	10433	80974	binary	opioids	opioid use disorder	no - pval > 1.5E-8
36171425	Kember	2022	Nature Neuroscience	KCNN1	rs112068658	gwas; internal meta-analysis	https://www.nature.com/articles/s41593-022-01160-z#citeas	lenient opioid use disorder	African American; European American; Hispanic American	425944	31473	394471	binary	opioids	opioid use disorder	no - pval > 1.5E-8
36171425	Kember	2022	Nature Neuroscience	KCNN1	rs112068658	gwas; meta-analysis	https://www.nature.com/articles/s41593-022-01160-z#citeas	opioid use disorder	African American; European American; Hispanic American	447580	37826	409754	binary	opioids	opioid use disorder	no - pval > 1.5E-8
36171425	Kember	2022	Nature Neuroscience	MRS2	rs115133207	gwas	https://www.nature.com/articles/s41593-022-01160-z#citeas	lenient opioid use disorder	Hispanic American	34861	2527	32334	binary	opioids	opioid use disorder	no - pval > 1.5E-8
36171425	Kember	2022	Nature Neuroscience	NCAM1	rs1940701	gwas; internal meta-analysis	https://www.nature.com/articles/s41593-022-01160-z#citeas	lenient opioid use disorder	African American; European American; Hispanic American	425944	31473	394471	binary	opioids	opioid use disorder	no - pval > 1.5E-8
36171425	Kember	2022	Nature Neuroscience	NNT	rs6895529	gwas	https://www.nature.com/articles/s41593-022-01160-z#citeas	lenient opioid use disorder	African American	88498	8968	79530	binary	opioids	opioid use disorder	yes
36171425	Kember	2022	Nature Neuroscience	OPRM1	6-154059584	gwas; internal meta-analysis	https://www.nature.com/articles/s41593-022-01160-z#citeas	stringent opioid use disorder	African American; European American; Hispanic American	417930	23459	394471	binary	opioids	opioid use disorder	no - variant not in MGI
36171425	Kember	2022	Nature Neuroscience	OPRM1	rs17275521	gwas	https://www.nature.com/articles/s41593-022-01160-z#citeas	stringent opioid use disorder	European American	297647	15040	282607	binary	opioids	opioid use disorder	no - pval > 1.5E-8
36171425	Kember	2022	Nature Neuroscience	OPRM1	rs1799971	gwas; internal meta-analysis	https://www.nature.com/articles/s41593-022-01160-z#citeas	stringent opioid use disorder	African American; European American; Hispanic American	417930	23459	394471	binary	opioids	opioid use disorder	yes
36171425	Kember	2022	Nature Neuroscience	OPRM1	rs1799971	gwas; internal meta-analysis	https://www.nature.com/articles/s41593-022-01160-z#citeas	lenient opioid use disorder	African American; European American; Hispanic American	425944	31473	394471	binary	opioids	opioid use disorder	yes
36171425	Kember	2022	Nature Neuroscience	OPRM1	rs1799971	gwas; meta-analysis	https://www.nature.com/articles/s41593-022-01160-z#citeas	opioid use disorder	African American; European American; Hispanic American	447580	37826	409754	binary	opioids	opioid use disorder	yes
36171425	Kember	2022	Nature Neuroscience	OPRM1	rs1799971	gwas	https://www.nature.com/articles/s41593-022-01160-z#citeas	stringent opioid use disorder	European American	297647	15040	282607	binary	opioids	opioid use disorder	yes
36171425	Kember	2022	Nature Neuroscience	OPRM1	rs1799971	gwas	https://www.nature.com/articles/s41593-022-01160-z#citeas	lenient opioid use disorder	European American	302585	19978	282607	binary	opioids	opioid use disorder	yes
36171425	Kember	2022	Nature Neuroscience	OPRM1	rs1799971	gwas; meta-analysis	https://www.nature.com/articles/s41593-022-01160-z#citeas	opioid use disorder	European American	321312	24866	296446	binary	opioids	opioid use disorder	yes
36171425	Kember	2022	Nature Neuroscience	OPRM1	rs3778149	gwas; meta-analysis	https://www.nature.com/articles/s41593-022-01160-z#citeas	opioid use disorder	European American	321312	24866	296446	binary	opioids	opioid use disorder	yes
36171425	Kember	2022	Nature Neuroscience	OPRM1	rs3778151	gwas; internal meta-analysis	https://www.nature.com/articles/s41593-022-01160-z#citeas	lenient opioid use disorder	African American; European American; Hispanic American	425944	31473	394471	binary	opioids	opioid use disorder	yes
36171425	Kember	2022	Nature Neuroscience	OPRM1	rs3778151	gwas; meta-analysis	https://www.nature.com/articles/s41593-022-01160-z#citeas	opioid use disorder	African American; European American; Hispanic American	447580	37826	409754	binary	opioids	opioid use disorder	yes
36171425	Kember	2022	Nature Neuroscience	PRL	rs150135643	gwas	https://www.nature.com/articles/s41593-022-01160-z#citeas	stringent opioid use disorder	Hispanic American	34296	1962	32334	binary	opioids	opioid use disorder	yes
36171425	Kember	2022	Nature Neuroscience	RABEPK	rs420768	gwas; meta-analysis	https://www.nature.com/articles/s41593-022-01160-z#citeas	opioid use disorder	African American; European American; Hispanic American	447580	37826	409754	binary	opioids	opioid use disorder	yes
36171425	Kember	2022	Nature Neuroscience	RABEPK	rs5900646	gwas; internal meta-analysis	https://www.nature.com/articles/s41593-022-01160-z#citeas	lenient opioid use disorder	African American; European American; Hispanic American	425944	31473	394471	binary	opioids	opioid use disorder	no - variant not in MGI, pval > 5E-8
36171425	Kember	2022	Nature Neuroscience	RNF114	rs11906300	gwas; meta-analysis	https://www.nature.com/articles/s41593-022-01160-z#citeas	opioid use disorder	African American; European American; Hispanic American	447580	37826	409754	binary	opioids	opioid use disorder	yes
36171425	Kember	2022	Nature Neuroscience	RNF114	rs7272308	gwas; internal meta-analysis	https://www.nature.com/articles/s41593-022-01160-z#citeas	lenient opioid use disorder	African American; European American; Hispanic American	425944	31473	394471	binary	opioids	opioid use disorder	yes
36171425	Kember	2022	Nature Neuroscience	SCAI	rs10986566	gwas; meta-analysis	https://www.nature.com/articles/s41593-022-01160-z#citeas	opioid use disorder	European American	321312	24866	296446	binary	opioids	opioid use disorder	no - pval > 1.5E-8
36171425	Kember	2022	Nature Neuroscience	SOX4	rs76450220	gwas; internal meta-analysis	https://www.nature.com/articles/s41593-022-01160-z#citeas	lenient opioid use disorder	African American; European American; Hispanic American	425944	31473	394471	binary	opioids	opioid use disorder	no - pval > 1.5E-8
36171425	Kember	2022	Nature Neuroscience	SOX4	rs76450220	gwas; meta-analysis	https://www.nature.com/articles/s41593-022-01160-z#citeas	opioid use disorder	African American; European American; Hispanic American	447580	37826	409754	binary	opioids	opioid use disorder	no - pval > 1.5E-8
36171425	Kember	2022	Nature Neuroscience	TSNARE1	rs13262595	gwas; internal meta-analysis	https://www.nature.com/articles/s41593-022-01160-z#citeas	stringent opioid use disorder	African American; European American; Hispanic American	417930	23459	394471	binary	opioids	opioid use disorder	no - pval > 1.5E-8
36171425	Kember	2022	Nature Neuroscience	TSNARE1	rs13262595	gwas	https://www.nature.com/articles/s41593-022-01160-z#citeas	stringent opioid use disorder	European American	297647	15040	282607	binary	opioids	opioid use disorder	yes
36171425	Kember	2022	Nature Neuroscience	TSNARE1	rs4129585	gwas; meta-analysis	https://www.nature.com/articles/s41593-022-01160-z#citeas	opioid use disorder	European American	321312	24866	296446	binary	opioids	opioid use disorder	yes
36171425	Kember	2022	Nature Neuroscience		rs1415556	gwas; internal meta-analysis	https://www.nature.com/articles/s41593-022-01160-z#citeas	lenient opioid use disorder	African American; European American; Hispanic American	425944	31473	394471	binary	opioids	opioid use disorder	yes
9152990	Kotler	1997	Mol Psychiatry	DRD4	exon 3 VNTR polymorphism	candidate	https://www.nature.com/articles/4000248.pdf	heroin dependence	Israeli	241	141	110	binary	heroin	opioid use disorder	no - not a SNP
22138325	Kumar	2012	Prog Neuropsychopharmacol Biol Psychiatry	OPRM1	rs1799971	candidate	https://www.sciencedirect.com/science/article/pii/S0278584611003150?via%3Dihub	heroin addiction	Indian	330	130	200	binary	heroin	opioid use disorder	yes
21358750	Levran	2012	Pharmacogenomics J	NGFB	rs2239622	candidate	https://www.nature.com/articles/tpj20116	methadone dosage	Trans-ancestry	72			quantitative/ordinal	methadone	drug treatment	yes
9322237	Li	1997	Mol Psychiatry	DRD4	exon 3 VNTR polymorphism	candidate	https://www.nature.com/articles/4000310	heroin dependence	Han Chinese	275	121	154	binary	heroin	opioid use disorder	no - not a SNP
23533358	Liu	2013	ScientificWorldJournal	NCK2	rs2377339	gwas	https://www.ncbi.nlm.nih.gov/pmc/articles/PMC3603435/	opioid dependent	African-origin males	535	44	491	binary	opioids	opioid use disorder	no - pval > 1.5E-8
17440936	Loh	2007	Am J Med Genet B Neuropsychiatr Genet	GABRG2	rs211014	candidate	https://pubmed.ncbi.nlm.nih.gov/17440936/	heroin dependence	Han Chinese	348	178	170	binary	heroin	opioid use disorder	yes
29173032	Luo	2017	Pharmacogenomics J	ABCB1	rs1128503	candidate	https://www.futuremedicine.com/doi/10.2217/pgs-2017-0072	methadone dosage	Han Chinese	257			quantitative/ordinal	methadone	drug treatment	yes
29173032	Luo	2017	Pharmacogenomics J	ARRB2	rs1045280	candidate	https://www.futuremedicine.com/doi/10.2217/pgs-2017-0072	methadone dosage	Han Chinese	257			quantitative/ordinal	methadone	drug treatment	yes
29173032	Luo	2017	Pharmacogenomics J	OPRD1	rs529520	candidate	https://www.futuremedicine.com/doi/10.2217/pgs-2017-0072	methadone dosage	Han Chinese	257			quantitative/ordinal	methadone	drug treatment	yes
28928973	Matsuoka	2017	Biomed Rep	COMT	rs4680	candidate	https://www.ncbi.nlm.nih.gov/pmc/articles/PMC5590034/	morphine dosage	Japanese	50			quantitative/ordinal	morphine	clinical pain research	yes
9261824	Mayer	1997	Neuroreport	OPRD1	rs2234918	candidate	https://pubmed.ncbi.nlm.nih.gov/9261824/	heroin dependence	German Caucasian	218	103	115	binary	heroin	opioid use disorder	yes
28656735	Nagaya	2018	J Clin Pharm Ther	OPRD1	rs1042114	candidate	https://pubmed.ncbi.nlm.nih.gov/28656735/	opioid dependence	Malaysian Malays	1002	459	543	binary		opioid use disorder	yes
28656735	Nagaya	2018	J Clin Pharm Ther	OPRK1	rs702764	candidate	https://pubmed.ncbi.nlm.nih.gov/28656735/	opioid dependence	Malaysian Malays	1002	459	543	binary		opioid use disorder	yes
28656735	Nagaya	2018	J Clin Pharm Ther	PDYN	rs910080	candidate	https://pubmed.ncbi.nlm.nih.gov/28656735/	opioid dependence	Malaysian Malays	1002	459	543	binary		opioid use disorder	yes
23303482	Nelson	2013	JAMA Psychiatry	ANKK1	rs4938013	candidate	https://www.ncbi.nlm.nih.gov/pmc/articles/PMC3789525/	heroin dependence	Australian	1799	1459	340	binary	heroin	opioid use disorder	yes
23303482	Nelson	2013	JAMA Psychiatry	ANKK1	rs877138	candidate	https://www.ncbi.nlm.nih.gov/pmc/articles/PMC3789525/	heroin dependence	Australian	1799	1459	340	binary	heroin	opioid use disorder	yes
23303482	Nelson	2013	JAMA Psychiatry	NCAM1	rs4492854	candidate	https://www.ncbi.nlm.nih.gov/pmc/articles/PMC3789525/	heroin dependence	Australian	1799	1459	340	binary	heroin	opioid use disorder	yes
23303482	Nelson	2013	JAMA Psychiatry	TTC12	rs7130431	candidate	https://www.ncbi.nlm.nih.gov/pmc/articles/PMC3789525/	heroin dependence	Australian	1799	1459	340	binary	heroin	opioid use disorder	yes
22500942	Nelson	2014	Addict Biol.	OPRD1	rs2236857	candidate	https://www.ncbi.nlm.nih.gov/pmc/articles/PMC3867542/	heroin dependence	European; East Asian	3485	1459	2026	binary	heroin	opioid use disorder	yes
22500942	Nelson	2014	Addict Biol.	OPRD1	rs581111	candidate	https://www.ncbi.nlm.nih.gov/pmc/articles/PMC3867542/	heroin dependence	European; East Asian	3485	1459	2026	binary	heroin	opioid use disorder	yes
26239289	Nelson	2016	Mol Psychiatry	CNIH3	rs10799590	candidate; meta-analysis	https://www.ncbi.nlm.nih.gov/pmc/articles/PMC4740268/	opioid dependent daily injectors vs. opioid misusers	European	2637	2000	637	binary	heroin	opioid use disorder	yes
26239289	Nelson	2016	Mol Psychiatry	CNIH3	rs12130499	candidate; meta-analysis	https://www.ncbi.nlm.nih.gov/pmc/articles/PMC4740268/	opioid dependent daily injectors vs. opioid misusers	European	2637	2000	637	binary	heroin	opioid use disorder	yes
26239289	Nelson	2016	Mol Psychiatry	CNIH3	rs1369846	candidate; meta-analysis	https://www.ncbi.nlm.nih.gov/pmc/articles/PMC4740268/	opioid dependent daily injectors vs. opioid misusers	European	2637	2000	637	binary	heroin	opioid use disorder	yes
26239289	Nelson	2016	Mol Psychiatry	CNIH3	rs1436171	candidate; meta-analysis	https://www.ncbi.nlm.nih.gov/pmc/articles/PMC4740268/	opioid dependent daily injectors vs. opioid misusers	European	2637	2000	637	binary	heroin	opioid use disorder	yes
26239289	Nelson	2016	Mol Psychiatry	CNIH3	rs1436175	gwas	https://www.ncbi.nlm.nih.gov/pmc/articles/PMC4740268/	opioid dependent daily injectors vs. opioid misusers	European	1328	1167	161	binary	heroin	opioid use disorder	no - pval > 1.5E-8
26239289	Nelson	2016	Mol Psychiatry	CNIH3	rs298733	candidate; meta-analysis	https://www.ncbi.nlm.nih.gov/pmc/articles/PMC4740268/	opioid dependent daily injectors vs. opioid misusers	European	2637	2000	637	binary	heroin	opioid use disorder	yes
18195715	Nielsen	2008	Mol Psychiatry	MYOCD	rs1714984	gwas	https://www.ncbi.nlm.nih.gov/pmc/articles/PMC3810149/	former heroin addiction	European	205	104	101	binary	heroin	opioid use disorder	no - pval > 1.5E-8
18195715	Nielsen	2008	Mol Psychiatry		rs1867898	gwas	https://www.ncbi.nlm.nih.gov/pmc/articles/PMC3810149/	former heroin addiction	European	205	104	101	binary	heroin	opioid use disorder	no - pval > 1.5E-8
18195715	Nielsen	2008	Mol Psychiatry		rs965972	gwas	https://www.ncbi.nlm.nih.gov/pmc/articles/PMC3810149/	former heroin addiction	European	205	104	101	binary	heroin	opioid use disorder	no - pval > 1.5E-8
20520587	Nielsen	2010	Psychiatr Genet.	CMYA3	rs10497320	gwas	https://www.ncbi.nlm.nih.gov/pmc/articles/PMC3832188/	vulnerability to develop heroin addiction, i.e. former heroin addiction	African American	225	125	100	binary	heroin	opioid use disorder	no - variant not in MGI
20520587	Nielsen	2010	Psychiatr Genet.	CMYA3	rs1429931	gwas	https://www.ncbi.nlm.nih.gov/pmc/articles/PMC3832188/	vulnerability to develop heroin addiction, i.e. former heroin addiction	African American	225	125	100	binary	heroin	opioid use disorder	no - variant not in MGI
20520587	Nielsen	2010	Psychiatr Genet.	CMYA3	rs6706115	gwas	https://www.ncbi.nlm.nih.gov/pmc/articles/PMC3832188/	vulnerability to develop heroin addiction, i.e. former heroin addiction	African American	225	125	100	binary	heroin	opioid use disorder	no - variant not in MGI
20520587	Nielsen	2010	Psychiatr Genet.	DUSP27	rs950302	gwas	https://www.ncbi.nlm.nih.gov/pmc/articles/PMC3832188/	vulnerability to develop heroin addiction, i.e. former heroin addiction	African American	225	125	100	binary	heroin	opioid use disorder	yes
20520587	Nielsen	2010	Psychiatr Genet.	RIMS2	rs1156813	gwas	https://www.ncbi.nlm.nih.gov/pmc/articles/PMC3832188/	vulnerability to develop heroin addiction, i.e. former heroin addiction	European	350	200	150	binary	heroin	opioid use disorder	yes
20520587	Nielsen	2010	Psychiatr Genet.	RIMS2	rs2511571	gwas	https://www.ncbi.nlm.nih.gov/pmc/articles/PMC3832188/	vulnerability to develop heroin addiction, i.e. former heroin addiction	European	350	200	150	binary	heroin	opioid use disorder	no - variant not in MGI
20520587	Nielsen	2010	Psychiatr Genet.	RIMS2	rs2511576	gwas	https://www.ncbi.nlm.nih.gov/pmc/articles/PMC3832188/	vulnerability to develop heroin addiction, i.e. former heroin addiction	European	350	200	150	binary	heroin	opioid use disorder	no - variant not in MGI
20520587	Nielsen	2010	Psychiatr Genet.		rs10494334	gwas	https://www.ncbi.nlm.nih.gov/pmc/articles/PMC3832188/	vulnerability to develop heroin addiction, i.e. former heroin addiction	European	350	200	150	binary	heroin	opioid use disorder	yes
23183491	Nishizawa	2014	Mol Psychiatry	CREB1	rs2952768	candidate	https://www.ncbi.nlm.nih.gov/pmc/articles/PMC3873034/	analgesic dosage	Japanese	112			quantitative/ordinal	morphine/buprenorphine/pentazocine/pethidine	clinical pain research	yes
32099098	Polimanti	2020	Mol Psychiatry	LOC101928144	rs201123820	gwas; meta-analysis	https://www.nature.com/articles/s41380-020-0677-9	opioid dependent vs. unexposed	African	8294	1231	7063	binary	opioids	opioid use disorder	no - variant not in MGI, pval > 5E-8
32099098	Polimanti	2020	Mol Psychiatry	SDCCAG8	SDCCAG8	gene-based	https://www.nature.com/articles/s41380-020-0677-9	opioid exposure	African; European	36673	4173	32500	binary	opioids	opioid use disorder	no - not a SNP
32099098	Polimanti	2020	Mol Psychiatry	SLC30A9/BEND4	rs9291211	gwas; meta-analysis	https://www.nature.com/articles/s41380-020-0677-9	opioid exposure	European	28313	2876	25437	binary	opioids	opioid use disorder	no - pval > 1.5E-8
16344719	Proudnikov	2006	Pharmacogenet Genomics	HTR1B	rs6297	candidate	https://journals.lww.com/jpharmacogenetics/Abstract/2006/01000/Association_analysis_of_polymorphisms_in_serotonin.4.aspx	former heroin addiction	European	<314	<253	<161	binary	heroin	opioid use disorder	yes
15927391	Rakvag	2005	Pain	COMT	rs4680	candidate	https://www.sciencedirect.com/science/article/pii/S0304395905001582?casa_token=NkJJaduuexIAAAAA:lHBntBatUA8FOUwGJ52R602m__6lQnCQIXKk73W1CId44vvbvWI5-s5lpAQIjcru-id9xD3m	morphine dosage	European	204			quantitative/ordinal	morphine	clinical pain research	yes
18990769	Reyes-Gibby	2008	Cancer Epidemiol Biomarkers Prev	TNF	rs1800629	candidate	https://www.ncbi.nlm.nih.gov/pmc/articles/PMC3398799/	pain severity at first follow-up visit	White	140			quantitative/ordinal	morphine/oxycodone/fentanyl/hydromorphone/methadone	clinical pain research	yes
18990769	Reyes-Gibby	2008	Cancer Epidemiol Biomarkers Prev	TNF	rs1800795	candidate	https://www.ncbi.nlm.nih.gov/pmc/articles/PMC3398799/	pain severity at first follow-up visit	White	140			quantitative/ordinal	morphine/oxycodone/fentanyl/hydromorphone/methadone	clinical pain research	yes
18990769	Reyes-Gibby	2008	Cancer Epidemiol Biomarkers Prev	TNF	rs1800795	candidate	https://www.ncbi.nlm.nih.gov/pmc/articles/PMC3398799/	morphine equivalent daily dose	White	140			quantitative/ordinal	morphine/oxycodone/fentanyl/hydromorphone/methadone	clinical pain research	yes
34728798	Sanchez-Roige	2021	Mol Psychiatry	KDM4A	rs3791033	gwas	https://www.nature.com/articles/s41380-021-01335-3	used prescpription opioids "not as described"	European	132113	27805	104308	binary	prescription opioids	misuse	no - pval > 1.5E-8
34728798	Sanchez-Roige	2021	Mol Psychiatry	LRRIQ3	rs640561	gwas	https://www.nature.com/articles/s41380-021-01335-3	used prescpription opioids "not as described"	European	132113	27805	104308	binary	prescription opioids	misuse	no - pval > 1.5E-8
28632076	Sharafshah	2017	J Psychoactive Drugs	OPRD1	rs2236855	candidate	https://pubmed.ncbi.nlm.nih.gov/28632076/	opium addiction	Iranian	404	202	202	binary	opioids	opioid use disorder	yes
28632076	Sharafshah	2017	J Psychoactive Drugs	OPRD1	rs2236857	candidate	https://pubmed.ncbi.nlm.nih.gov/28632076/	opium addiction	Iranian	404	202	202	binary	opioids	opioid use disorder	yes
28632076	Sharafshah	2017	J Psychoactive Drugs	OPRD1	rs678849	candidate	https://pubmed.ncbi.nlm.nih.gov/28632076/	opium addiction	Iranian	404	202	202	binary	opioids	opioid use disorder	yes
28632076	Sharafshah	2017	J Psychoactive Drugs	OPRD1	rs760589	candidate	https://pubmed.ncbi.nlm.nih.gov/28632076/	opium addiction	Iranian	404	202	202	binary	opioids	opioid use disorder	yes
11933204	Shi	2002	Hum Mutat	OPRM1	rs1799971	candidate	https://onlinelibrary.wiley.com/doi/epdf/10.1002/humu.9026	heroin addiction	Han Chinese	193	145	48	binary	heroin	opioid use disorder	yes
11933204	Shi	2002	Hum Mutat	OPRM1	rs9479757	candidate	https://onlinelibrary.wiley.com/doi/epdf/10.1002/humu.9026	higher daily dose/heroin addiction	Han Chinese	392	232	160	binary	heroin	opioid use disorder	yes
28115739	Smith	2017	Molecular Psychiatry	OPRM1	rs73568641	gwas	https://www.nature.com/articles/mp2016257	methadone dosage	African American	383			quantitative/ordinal	methadone	drug treatment	no - pval > 1.5E-8
32961455	Song	2020	Drug and Alcohol Dependence	AC023824.7	rs12596025	gwas	https://www.ncbi.nlm.nih.gov/pmc/articles/PMC7736461/	opioid use disorder	European	~11,783	1039	~10,744	binary	opioids	opioid use disorder	yes
32961455	Song	2020	Drug and Alcohol Dependence	AC097493.4	rs2001392	gwas	https://www.ncbi.nlm.nih.gov/pmc/articles/PMC7736461/	opioid use disorder	European	~11,783	1039	~10,744	binary	opioids	opioid use disorder	yes
32961455	Song	2020	Drug and Alcohol Dependence		rs10014685	gwas	https://www.ncbi.nlm.nih.gov/pmc/articles/PMC7736461/	opioid use disorder	European	21310	1039	20271	binary	opioids	opioid use disorder	no - pval > 1.5E-8
32961455	Song	2020	Drug and Alcohol Dependence		rs10014685	gwas	https://www.ncbi.nlm.nih.gov/pmc/articles/PMC7736461/	opioid use disorder	European	~11,783	1039	~10,744	binary	opioids	opioid use disorder	yes
32961455	Song	2020	Drug and Alcohol Dependence		rs114237113	gwas	https://www.ncbi.nlm.nih.gov/pmc/articles/PMC7736461/	opioid use disorder	European	21310	1039	20271	binary	opioids	opioid use disorder	no - pval > 1.5E-8
32961455	Song	2020	Drug and Alcohol Dependence		rs12931235	gwas	https://www.ncbi.nlm.nih.gov/pmc/articles/PMC7736461/	opioid use disorder	European	~11,783	1039	~10,744	binary	opioids	opioid use disorder	yes
25708696	Sun	2016	Addict Biol	ZNF804A	rs1344706	candidate	https://pubmed.ncbi.nlm.nih.gov/25708696/	heroin dependence	Han Chinese	3922	1035	2887	binary	heroin	opioid use disorder	yes
25708696	Sun	2016	Addict Biol	ZNF804A	rs7597593	candidate	https://pubmed.ncbi.nlm.nih.gov/25708696/	heroin dependence	Han Chinese	3922	1035	2887	binary	heroin	opioid use disorder	yes
11338173	Szeto	2001	Neuroreport	OPRM1	rs1799971	candidate	https://pubmed.ncbi.nlm.nih.gov/11338173/	heroin dependence	Han Chinese	297	200	97	binary	heroin	opioid use disorder	yes
11338173	Szeto	2001	Neuroreport	OPRM1	rs2075572	candidate	https://pubmed.ncbi.nlm.nih.gov/11338173/	heroin dependence	Han Chinese	297	200	97	binary	heroin	opioid use disorder	yes
10395208	Tan	1999	Mol Psychiatry	SLC6A4	10-repeat allele	candidate	https://www.nature.com/articles/4000541.pdf	heroin dependence	Chinese	135	63	72	binary	heroin	opioid use disorder	no - not a SNP
34871222	Tanaka	2021	Medicine (Baltimore)	COMT	rs4680	candidate	https://www.ncbi.nlm.nih.gov/pmc/articles/PMC8568420/	somnolence as an adverse effect of opioid analgesic therapy	Japanese	88			quantitative/ordinal	morphine/oxycodone	clinical pain research	yes
34871222	Tanaka	2021	Medicine (Baltimore)	OPRM1	rs1799971	candidate	https://www.ncbi.nlm.nih.gov/pmc/articles/PMC8568420/	somnolence as an adverse effect of opioid analgesic therapy	Japanese	88			quantitative/ordinal	morphine/oxycodone	clinical pain research	yes
28854834	Tsou	2019	World J Biol Psychiatry	DRD2/ANKK1	rs1079597	candidate	https://www.tandfonline.com/doi/abs/10.1080/15622975.2017.1372630?journalCode=iwbp20	heroin dependence	Han Chinese	950	601	349	binary	heroin	opioid use disorder	no - variant not in MGI
28854834	Tsou	2019	World J Biol Psychiatry	DRD2/ANKK1	rs1800497	candidate	https://www.tandfonline.com/doi/abs/10.1080/15622975.2017.1372630?journalCode=iwbp20	heroin dependence	Han Chinese	950	601	349	binary	heroin	opioid use disorder	yes
28854834	Tsou	2019	World J Biol Psychiatry	DRD2/ANKK1	rs1800498	candidate	https://www.tandfonline.com/doi/abs/10.1080/15622975.2017.1372630?journalCode=iwbp20	heroin dependence	Han Chinese	950	601	349	binary	heroin	opioid use disorder	yes
28854834	Tsou	2019	World J Biol Psychiatry	DRD2/ANKK1	rs4648319	candidate	https://www.tandfonline.com/doi/abs/10.1080/15622975.2017.1372630?journalCode=iwbp20	heroin dependence	Han Chinese	950	601	349	binary	heroin	opioid use disorder	yes
23840506	Vereczkei	2013	PLoS One	DRD2/ANKK1	rs1079597	candidate	https://www.ncbi.nlm.nih.gov/pmc/articles/PMC3696122/	heroin dependence	Hungarian	853	303	550	binary	heroin	opioid use disorder	no - variant not in MGI
23840506	Vereczkei	2013	PLoS One	DRD2/ANKK1	rs1800497	candidate	https://www.ncbi.nlm.nih.gov/pmc/articles/PMC3696122/	heroin dependence	Hungarian	853	303	550	binary	heroin	opioid use disorder	yes
23840506	Vereczkei	2013	PLoS One	DRD4	rs1800955	candidate	https://www.ncbi.nlm.nih.gov/pmc/articles/PMC3696122/	heroin dependence	Hungarian	853	303	550	binary	heroin	opioid use disorder	yes
30060048	Wang	2018	International Journal of Neuropsychopharmacology	GRK5	rs10787966	candidate	https://academic.oup.com/ijnp/article/21/10/910/5060252?login=false	methadone dosage	Taiwanese	344			quantitative/ordinal	methadone	drug treatment	yes
30060048	Wang	2018	International Journal of Neuropsychopharmacology	GRK5	rs10886472	candidate	https://academic.oup.com/ijnp/article/21/10/910/5060252?login=false	methadone dosage	Taiwanese	344			quantitative/ordinal	methadone	drug treatment	yes
30060048	Wang	2018	International Journal of Neuropsychopharmacology	GRK5	rs11198907	candidate	https://academic.oup.com/ijnp/article/21/10/910/5060252?login=false	methadone dosage	Taiwanese	344			quantitative/ordinal	methadone	drug treatment	yes
30060048	Wang	2018	International Journal of Neuropsychopharmacology	GRK5	rs12415832	candidate	https://academic.oup.com/ijnp/article/21/10/910/5060252?login=false	methadone dosage	Taiwanese	344			quantitative/ordinal	methadone	drug treatment	yes
30060048	Wang	2018	International Journal of Neuropsychopharmacology	GRK5	rs1889432	candidate	https://academic.oup.com/ijnp/article/21/10/910/5060252?login=false	methadone dosage	Taiwanese	344			quantitative/ordinal	methadone	drug treatment	yes
30060048	Wang	2018	International Journal of Neuropsychopharmacology	GRK5	rs2061078	candidate	https://academic.oup.com/ijnp/article/21/10/910/5060252?login=false	methadone dosage	Taiwanese	344			quantitative/ordinal	methadone	drug treatment	yes
30060048	Wang	2018	International Journal of Neuropsychopharmacology	GRK5	rs4752269	candidate	https://academic.oup.com/ijnp/article/21/10/910/5060252?login=false	methadone dosage	Taiwanese	344			quantitative/ordinal	methadone	drug treatment	yes
30060048	Wang	2018	International Journal of Neuropsychopharmacology	GRK5	rs4752300	candidate	https://academic.oup.com/ijnp/article/21/10/910/5060252?login=false	methadone dosage	Taiwanese	344			quantitative/ordinal	methadone	drug treatment	yes
21382455	Wei	2011	Brain Res Bull	PDYN	rs1022563	candidate	https://www.sciencedirect.com/science/article/pii/S0361923011000761?via%3Dihub#sec0030	heroin dependence	Han Chinese	604	304	300	binary	heroin	opioid use disorder	yes
21382455	Wei	2011	Brain Res Bull	PDYN	rs2235749	candidate	https://www.sciencedirect.com/science/article/pii/S0361923011000761?via%3Dihub#sec0030	heroin dependence	Han Chinese	604	304	300	binary	heroin	opioid use disorder	yes
21382455	Wei	2011	Brain Res Bull	PDYN	rs35286281 (PDYN 68bp VNTR H allele)	candidate	https://www.sciencedirect.com/science/article/pii/S0361923011000761?via%3Dihub#sec0030	heroin dependence	Han Chinese	604	304	300	binary	heroin	opioid use disorder	no - not a SNP
21382455	Wei	2011	Brain Res Bull	PDYN	rs910080	candidate	https://www.sciencedirect.com/science/article/pii/S0361923011000761?via%3Dihub#sec0030	heroin dependence	Han Chinese	604	304	300	binary	heroin	opioid use disorder	yes
25122903	Xu	2014	J Neurosci	OPRM1	rs9479757	candidate	https://www.ncbi.nlm.nih.gov/pmc/articles/PMC4131016/	heroin addiction severity (mild, moderate, severe)	Han Chinese	522	332	190	binary	heroin	opioid use disorder	yes
27010727	Yang	2016	PLoS Genetics	CHBJPT	rs17180299	gwas	https://journals.plos.org/plosgenetics/article?id=10.1371/journal.pgen.1005910	Plasma Concentrations of R-Methadone	Taiwanese	344			quantitative/ordinal	methadone	drug treatment	no - pval > 1.5E-8
30138645	Yuanyuan	2018	Neurosci Lett	PDYN	rs35286281 (PDYN 68bp VNTR H allele)	candidate	https://www.sciencedirect.com/science/article/pii/S0304394018305688?via%3Dihub	heroin dependence	Han Chinese	1107	541	566	binary	heroin	opioid use disorder	no - not a SNP
15608558	Yuferov	2004	Pharmacogenetics	OPRK1	rs1051660	candidate	https://www.ncbi.nlm.nih.gov/pmc/articles/PMC6141019/	former heroin addiction	Trans-ancestry	291	145	156	binary	heroin	opioid use disorder	yes
29550268	Zhang	2018	Brain Res	ANKK1	rs11214598	candidate	https://www.sciencedirect.com/science/article/pii/S0006899318301525?via%3Dihub	heroin dependence	Han Chinese	593	314	279	binary	heroin	opioid use disorder	yes
29550268	Zhang	2018	Brain Res	ANKK1	rs1800497	candidate; meta-analysis	https://www.sciencedirect.com/science/article/pii/S0006899318301525?via%3Dihub	heroin dependence	Han Chinese	3285	1749	1536	binary	heroin	opioid use disorder	yes
29550268	Zhang	2018	Brain Res	DRD2	rs1079597	candidate	https://www.sciencedirect.com/science/article/pii/S0006899318301525?via%3Dihub	heroin dependence	Han Chinese	593	314	279	binary	heroin	opioid use disorder	no - variant not in MGI
29550268	Zhang	2018	Brain Res	DRD2	rs2245805	candidate	https://www.sciencedirect.com/science/article/pii/S0006899318301525?via%3Dihub	heroin dependence	Han Chinese	593	314	279	binary	heroin	opioid use disorder	yes
31337162	Zhang	2019	Pain physician journal	OPRM1	rs1799971	candidate; meta-analysis	https://www.painphysicianjournal.com/current/pdf?article=NjQwMw%3D%3D&journal=121	opioid intake requirement	Trans-ancestry	8609			quantitative/ordinal	piritramide/morphine/oxycodone/fentanyl/remifentanil/sufentanil	clinical pain research	yes
32492095	Zhou	2020	JAMA Psychiatry	OPRM1	rs1799971	gwas; meta-analysis	https://www.ncbi.nlm.nih.gov/pmc/articles/PMC7270886/	opioid use disorder	European	82707	10544	72163	binary	opioids	opioid use disorder	no - pval > 1.5E-8
